# Supplementary material for: Rapid Identification of Corn Sugar Syrup Adulteration in Wolfberry Honey Based on Fluorescence Spectroscopy Coupled with Chemometrics
Source: MDPI journal article supplement (doi:10.3390/foods12122309), 2023-06-08
Supplement: s1 [file s1]

Supplementary Table S1 Characteristic parameters of acacia honey

| Variables         | Units       | Acacia honey |
|-------------------|-------------|--------------|
| pH                | -           | 3.79±0.01    |
| Water             | g per 100 g | 17.13±0.23   |
| Total sugar       | g per 100 g | 81.56±0.37   |
| Baume degree      | °Bé         | 43.06±0.11   |
| Protein content   | mg per100g  | 30.8±0.05    |
| Conductivity      | μS/cm       | 136.50±0.71  |
| Diastase activity | mL/(g·h)    | 28.30±1.82   |
