# Supplementary material for: Rapid Identification of Corn Sugar Syrup Adulteration in Wolfberry Honey Based on Fluorescence Spectroscopy Coupled with Chemometrics
Source: MDPI journal article supplement (doi:10.3390/foods12122309), 2023-06-08
Supplement: s1 [file s1]

Supplementary Table S2 The comparison of honeys and syrups between the maximum fluorescence intensities and peak positions at the excitation wavelength of 230 nm and 280 nm

|                        | wolfberry honey |         | corn syrup |         | corn maltose syrup |         | acacia honey |         |
|------------------------|-----------------|---------|------------|---------|--------------------|---------|--------------|---------|
|                        | 230 nm          | 280 nm  | 230 nm     | 280 nm  | 230 nm             | 280 nm  | 230 nm       | 280 nm  |
| Maximum                | 172.34±         | 196.03± | 25.13±     | 43.64±  | 21.81±             | 16.27±  | 108.67±      | 131.95± |
| fluorescence intensity | 16.78           | 20.84   | 7.78       | 6.51    | 5.30               | 6.61    | 13.48        | 3.75    |
| Peak position (nm)     | 330.00±         | 330.36± | 300.00±    | 290.00± | 355.00±            | 325.00± | 335.00±      | 330.00± |
|                        | 0.00            | 1.89    | 0.00       | 0.00    | 21.21              | 7.07    | 7.071        | 0.00    |
