# Supplementary material for: Rapid Identification of Corn Sugar Syrup Adulteration in Wolfberry Honey Based on Fluorescence Spectroscopy Coupled with Chemometrics
Source: MDPI journal article supplement (doi:10.3390/foods12122309), 2023-06-08
Supplement: s1 [file s1]

Supplementary Table S3 The mean fluorescence lifetime of different samples

|                       | wolfberry honey | acacia honey   | corn syrup    | corn maltose syrup |
|-----------------------|-----------------|----------------|---------------|--------------------|
| Fluorescence lifetime | 7155.45±160.52  | 6551.22±109.91 | 7360.33±18.61 | 7267.67±5.48       |
